# Supplementary material
Source: PubMed Central journal article supplement (PMC5467114)
Supplement: Supp_Fig2.pdf [file Supp_Fig2.pdf]

## A Relative mRNA levels

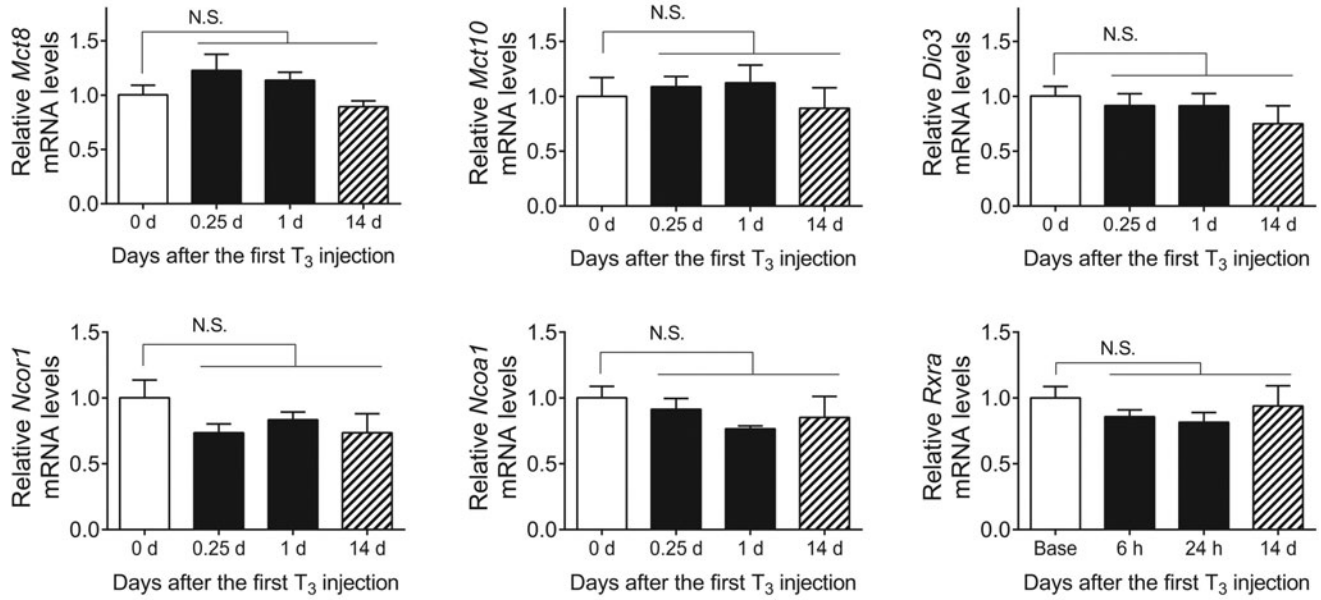

## B Relative protein expression levels

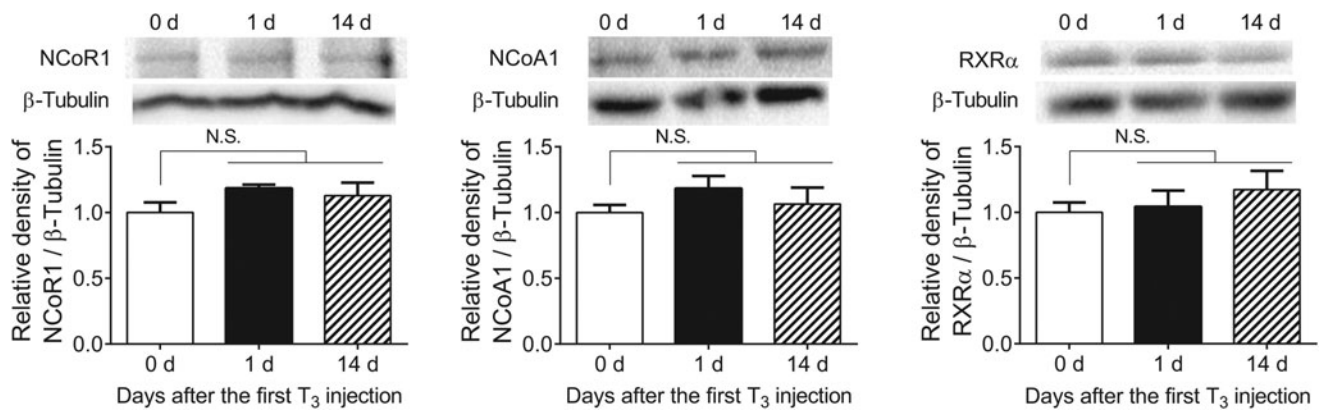

**SUPPLEMENTARY FIG. S2.** Temporal patterns of mRNA and corresponding protein expression in key regulators determining ultimate TH effects after acute and chronic  $T_3$  treatment. Adult male mice (8–10 weeks old) were treated with 20  $\mu\text{g}$  of  $T_3$ /100 g of body weight for 14 days. Relative mRNA expression for *Mct8*, *Mct10*, *Dio3*, *Ncor1*, *Ncoa1*, and *Rxra* (A), as well as relative protein expression for NCoR1, NCoA1, and RXR $\alpha$  (B), were determined at indicated  $T_3$  treatment periods after the first  $T_3$  injections. No treatment (blank); acute  $T_3$  treatment (black); chronic  $T_3$  treatment (hashed) are shown. Data are presented as means  $\pm$  SEM ( $n=4-5$ /group). N.S., statistically not significant determined by one-way ANOVA compared to no treatment (0 days).
