# Supplementary material
Source: PubMed Central journal article supplement (PMC5467114)
Supplement: Supp_Fig3.pdf [file Supp_Fig3.pdf]

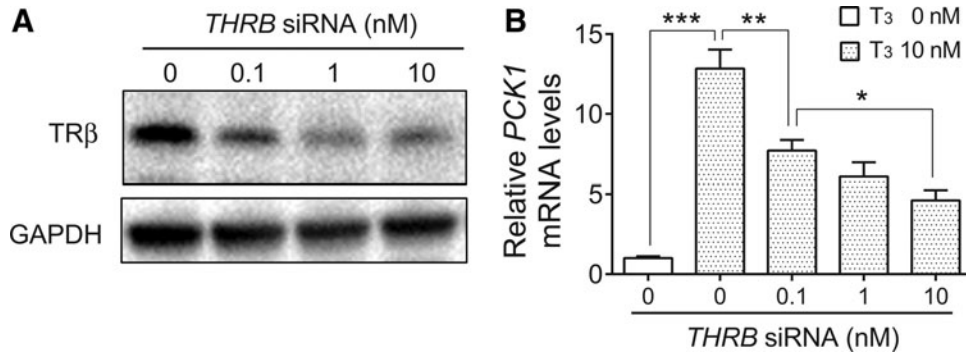

**SUPPLEMENTARY FIG. S3.** Relative expression of *PCK1* by varying amounts of *THRB* knockdown in a human hepatocellular carcinoma cell line. HepG2 cells expressing TR $\beta$  (*THRB*-HepG2) were transfected with 0.1–10 nM of siRNA targeting *THRB*. After 48 h of culture, the cells were treated with 10 nM of T<sub>3</sub> for an additional 24 h. **(A)** Protein expression of TR $\beta$  and GAPDH were determined by Western blot analysis under indicated conditions. **(B)** Relative mRNA expression of *PCK1* was calculated using the  $2^{-\Delta\Delta C_T}$  method and normalized to *POLR2A*. Data are presented as means  $\pm$  SEM ( $n = 3$ /group). \* $p < 0.05$ ; \*\* $p < 0.01$ ; \*\*\* $p < 0.001$  by one-way ANOVA.
