# Supplementary material
Source: PubMed Central journal article supplement (PMC5467114)
Supplement: Supp_Fig4.pdf [file Supp_Fig4.pdf]

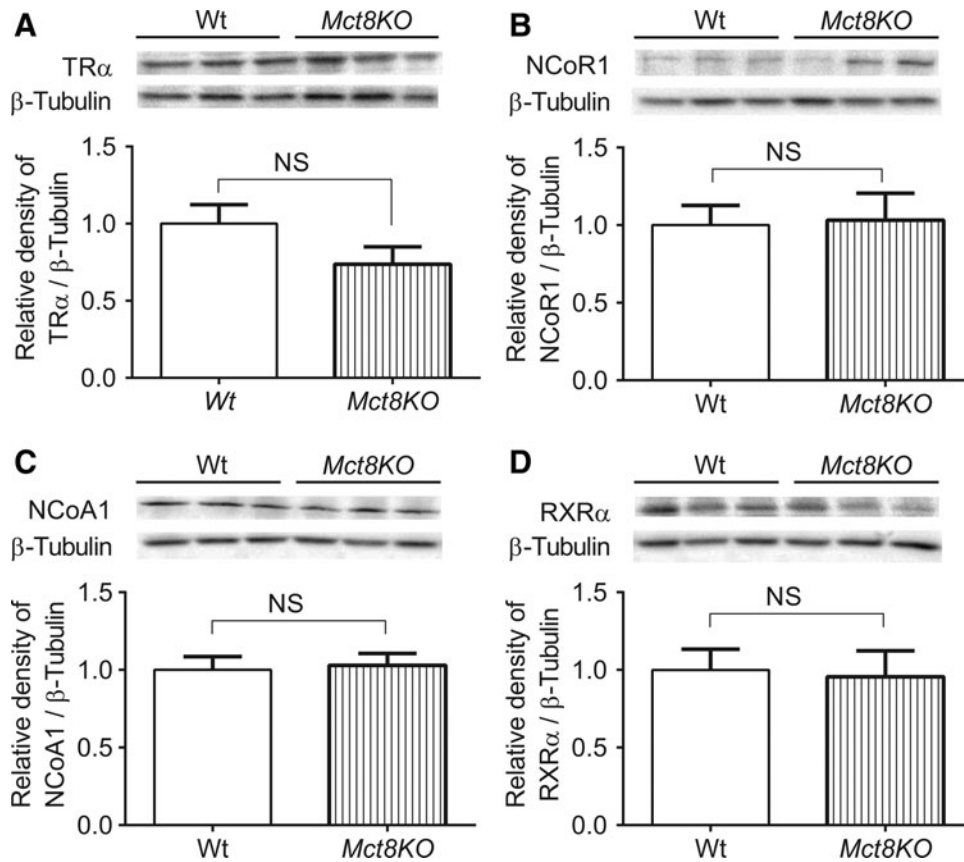

**SUPPLEMENTARY FIG. S4.** Representative immunoblot and bar graph showing relative densitometric measurements of (A) TR $\alpha$ , (B) NCoR1, (C) NCoA1, and (D) RXR $\alpha$  in wild-type (Wt) and *Mct8*-knockout (*Mct8KO*) mice. After quantification of the target protein and  $\beta$ -tubulin in each lane, the ratios of intensity of target protein/ $\beta$ -tubulin were expressed as the fold changes relative to the mean value of Wt mice. Data are presented as means  $\pm$  SEM ( $n = 6$ /group). N.S., statistically not significant determined by two-tailed Student's *t*-test.
