# Supplementary material
Source: PubMed Central journal article supplement (PMC5467114)
Supplement: Supp_Fig5.pdf [file Supp_Fig5.pdf]

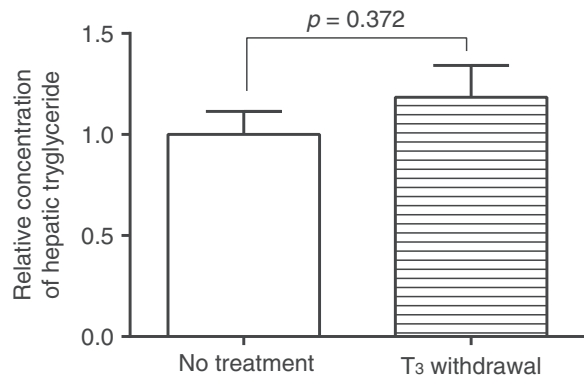

**SUPPLEMENTARY FIG. S5.** Hepatic triglyceride concentration after T<sub>3</sub> withdrawal. Data (means ± SEM;  $n = 3/\text{group}$ ) are expressed as the fold change relative to the mean value of non-treated mice.
