# Supplementary material
Source: PubMed Central journal article supplement (PMC5467114)
Supplement: Supp_Table1.pdf [file Supp_Table1.pdf]

SUPPLEMENTARY TABLE S1. MICROARRAY RESULTS  
FOR *RXR*, *NCOA*, *DIO*, AND *DGAT* ISOFORMS  
AFTER T3 TREATMENT AND WITHDRAWAL

| <i>Gene</i>  | <i>Group</i> | <i>FC</i> <sup>a</sup> | <i>Z-score</i> <sup>b</sup> |
|--------------|--------------|------------------------|-----------------------------|
| <i>Rxb</i>   | Acute        | 1.17                   | 1.12                        |
|              | Chronic      | 1.12                   | 0.52                        |
|              | Recovery     | 0.99                   | -0.09                       |
| <i>Rrg</i>   | Acute        | 1.00                   | 0.03                        |
|              | Chronic      | 1.04                   | 0.21                        |
|              | Recovery     | 1.00                   | 0.01                        |
| <i>Ncoa2</i> | Acute        | 1.00                   | 0.05                        |
|              | Chronic      | 1.06                   | 0.35                        |
|              | Recovery     | 1.05                   | 0.51                        |
| <i>Ncoa3</i> | Acute        | 0.94                   | -0.57                       |
|              | Chronic      | 0.87                   | -0.80                       |
|              | Recovery     | 0.92                   | -0.79                       |
| <i>Dio3</i>  | Acute        | 0.96                   | -0.37                       |
|              | Chronic      | 0.98                   | -0.72                       |
|              | Recovery     | 0.99                   | -0.13                       |
| <i>Dgat1</i> | Acute        | 1.04                   | 0.33                        |
|              | Chronic      | 0.93                   | -0.38                       |
|              | Recovery     | 0.97                   | -0.30                       |
| <i>Dgat2</i> | Acute        | 1.30                   | 1.30                        |
|              | Chronic      | 1.18                   | 0.50                        |
|              | Recovery     | 1.07                   | 0.38                        |

<sup>a</sup>Fold changes (FCs) are presented for treated mice relative to non-treated mice.

<sup>b</sup>Z-scores were determined as described previously (9). |Z-score| >2.58 was considered statistically significant ( $n = 3/\text{group}$ ).
