# Supplementary material
Source: PubMed Central journal article supplement (PMC5467114)
Supplement: Supp_Table2.pdf [file Supp_Table2.pdf]

SUPPLEMENTARY TABLE 2. AMINO ACID AND ORGANIC ACID PROFILE AFTER CHRONIC T3 AND T3 WITHDRAWAL

|                            | <i>No treatment (μM)</i> | <i>Chronic T3 (μM)</i> | <i>T3 withdrawal (μM)</i> |
|----------------------------|--------------------------|------------------------|---------------------------|
| <b><i>Amino acid</i></b>   |                          |                        |                           |
| <b>Alanine</b>             | 232.7±8.5                | 264.3±78.8             | 255.8±26.2                |
| <b>Arginine</b>            | 0.9±0.1                  | 1.3±0.2                | 1.3±0.3                   |
| <b>Asparagine</b>          | 14.0±1.1                 | 13.8±0.7               | 11.5±1.2                  |
| <b>Citrulline</b>          | 1.2±0.2                  | 2.2±0.1                | 1.7±0.5                   |
| <b>Glutamine</b>           | 33.5±3.1                 | 56.8±21.3              | 33.4±4.7                  |
| <b>Glycine</b>             | 122.3±5.7                | 119.6±8.5              | 166.6±28.1                |
| <b>Histidine</b>           | 14.4±1.2                 | 17.1±2.2               | 15.3±1.6                  |
| <b>Isoleucine/Leucine</b>  | 26.3±4.1                 | 34.3±1.5               | 38.5±10.4                 |
| <b>Methionine</b>          | 7.9±1.1                  | 12.4±1.1               | 10.8±1.7                  |
| <b>Ornithine</b>           | 20.6±3.8                 | 34.1±11.6              | 23.1±3.6                  |
| <b>Phenylalanine</b>       | 3.7±0.5                  | 5.3±0.5                | 5.3±1.0                   |
| <b>Proline</b>             | 16.8±1.7                 | 22.6±4.9               | 23.2±5.4                  |
| <b>Serine</b>              | 38.9±5.2                 | 49.2±3.0               | 48.9±7.1                  |
| <b>Tryptophan</b>          | 1.9±0.4                  | 2.5±0.2                | 2.7±0.6                   |
| <b>Tyrosine</b>            | 11.3±1.2                 | 12.1±3.5               | 12.7±1.4                  |
| <b>Valine</b>              | 20.3±5.0                 | 19.7±1.8               | 20.1±3.5                  |
| <b><i>Organic acid</i></b> |                          |                        |                           |
| <b>Citrate</b>             | 43.5±4.1                 | 44.9±1.1               | 45.9±13.4                 |
| <b>Fumarate</b>            | 14.6±1.3                 | 15.0±4.7               | 9.1±0.5                   |
| <b>Lactate</b>             | 1850.7±123.6             | 1652.5±220.8           | 2496.7±195.0*             |
| <b>Malate</b>              | 95.6±8.1                 | 102.7±30.5             | 69.5±3.0                  |
| <b>Pyruvate</b>            | 8.5±1.0                  | 5.9±0.8                | 10.9±0.9                  |
| <b>Succinate</b>           | 180.9±7.9                | 223.2±58.0             | 179.6±9.7                 |

\* $p < 0.05$  determined by one-way ANOVA compared to no treatment.
